# Supplementary material
Source: publisher figshare collection journal article supplement (https://gsajournals.figshare.com/ndownloader/files/22903811)
Supplement: Supplementary file 1 [file 22903811]

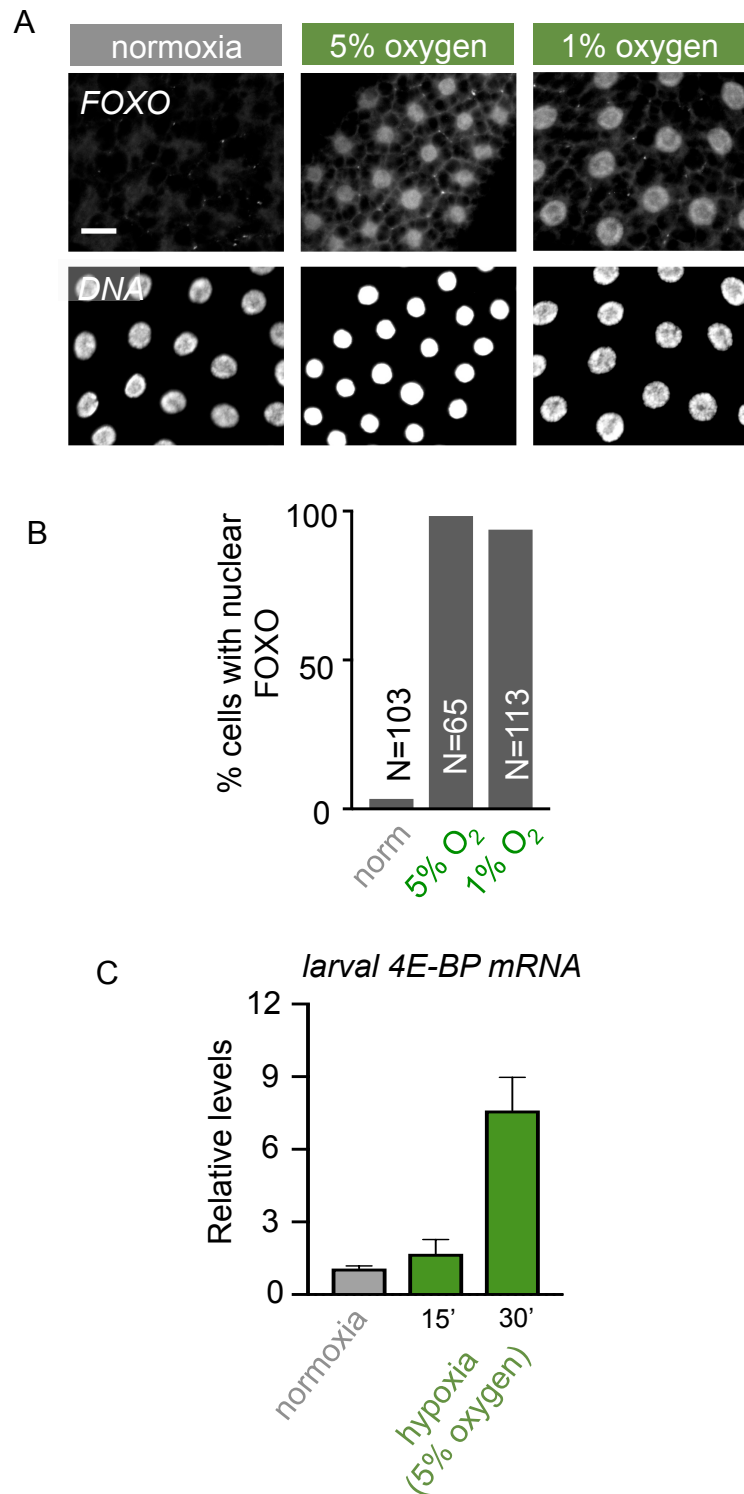

**Figure S1(corresponding to Figure 1). FOXO is induced rapidly in hypoxia.** (A) FOXO staining of 96-hour AEL *w<sup>1118</sup>* larval fat bodies following exposure to hypoxia for 15 minutes. Nuclei are stained with Hoechst (bottom panels). Scale bar is 25  $\mu$ m. (B) Quantification of FOXO nuclear localization in fat body cells following 15 min of hypoxia (5% and 1% oxygen exposure in third instar larvae. N= total number of cells analyzed. (C) *4e-bp* mRNA levels measured by qRT-PCR in control (*w<sup>1118</sup>*) larvae exposed to either normoxia or hypoxia (1% oxygen) for 15 or 30 minutes. Data represent mean + SEM, N=10, \*p<0.05, students t-test.

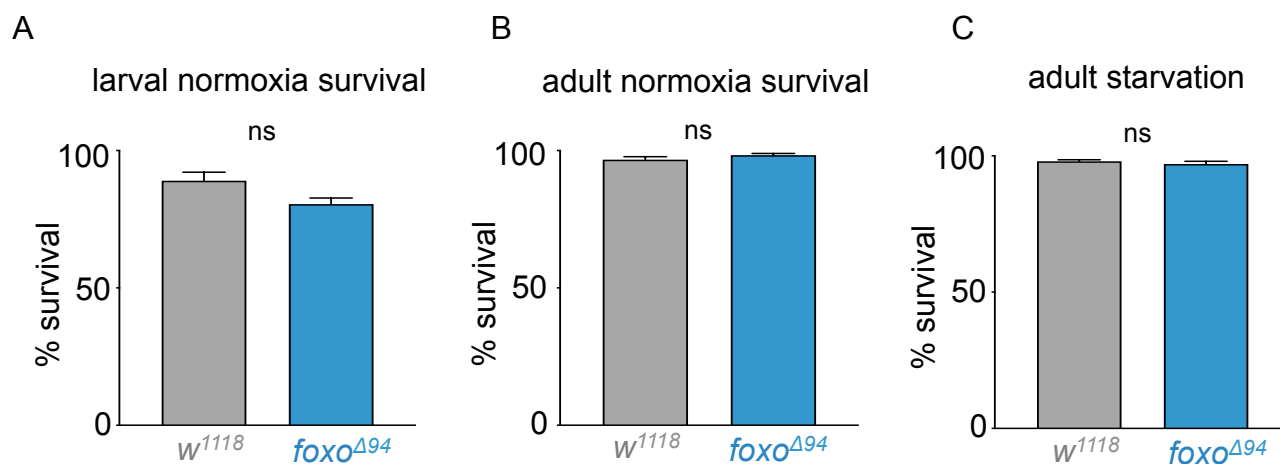

**Figure S2 (corresponding to Figure 2). *foxo* mutant survival is not affected in normoxia or by short-term nutrient deprivation.** (A) Data represent percentage of hatched *w<sup>1118</sup>* and *foxo<sup>Δ94</sup>* larvae that develop to viable adults in normoxia. (B) Survival of adult female *w<sup>1118</sup>* and *foxo<sup>Δ94</sup>* flies maintained in normoxia. Data represented as mean + SEM for n=4 groups of 20 flies. (C) Survival of adult female *w<sup>1118</sup>* and *foxo<sup>Δ94</sup>* flies after starvation for 24 hours. Data represented as mean + SEM for n=4 groups of 20 flies.

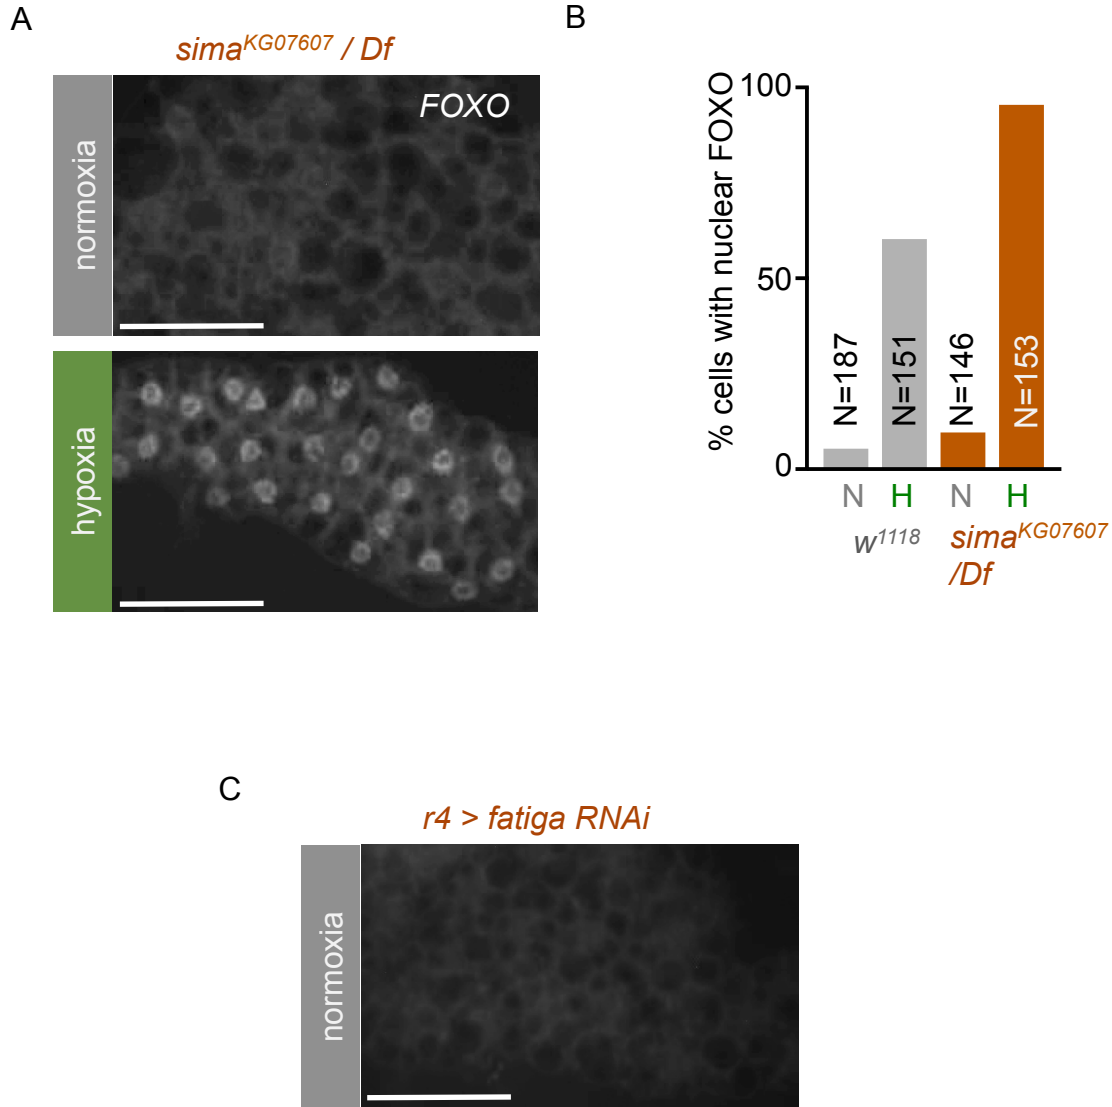

**Figure S3 (corresponding to Figure 4). Hypoxia induces FOXO independently of *sima*/HIF-1 alpha.** (A) FOXO staining of 96-hour AEL *sima*/*Df* mutant larval fat bodies following exposure to either normoxia or 5% O<sub>2</sub> hypoxia for 2hrs at 96-hour AEL. Scale bar is 50  $\mu$ m. (B) Quantification of FOXO nuclear localization in fat body cells of control (*w*<sup>1118</sup>) and *sima*/*Df* mutant larvae exposed to either normoxia or 5% O<sub>2</sub> hypoxia for 2hrs at 96-hour AEL. N= total number of cells analyzed. (C) FOXO staining of fat bodies from 96-hour AEL *r4-gal4* > *UAS-fatiga* IR larvae. Scale bar is 50  $\mu$ m

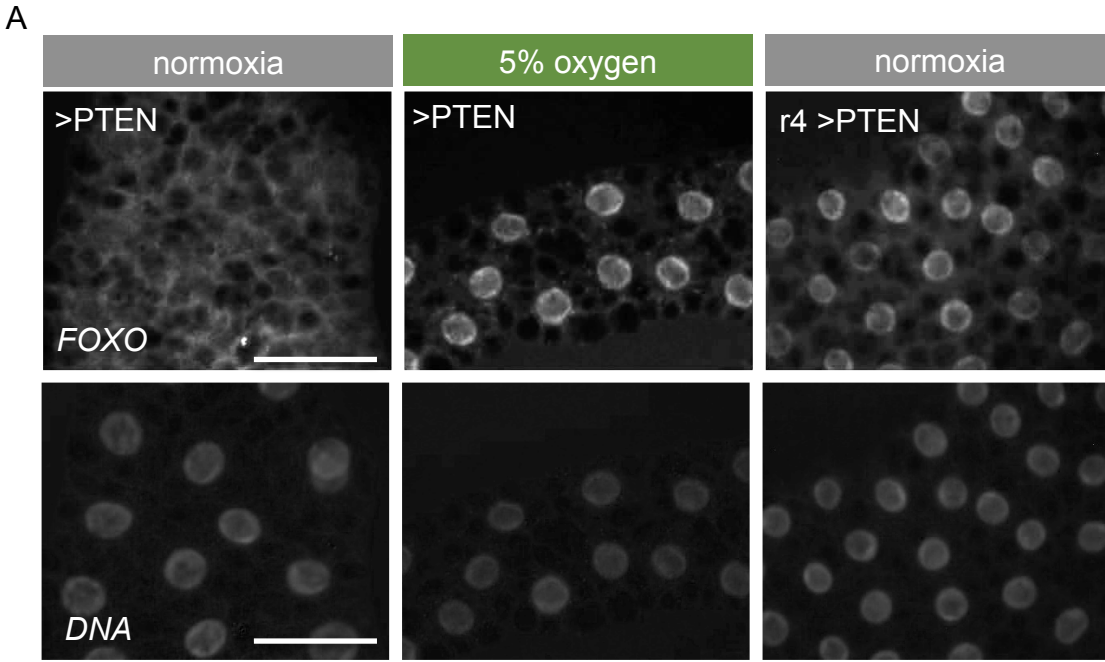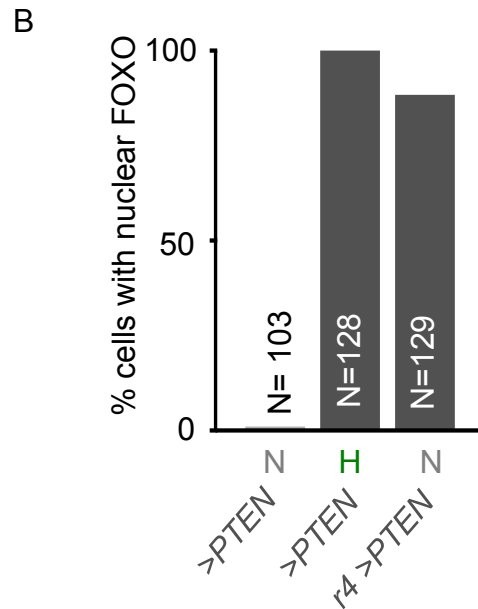

**Figure S4 (corresponding to Figure 5). Hypoxia induces FOXO by inhibiting PI3K/Akt.** (A) FOXO nuclear localization in fat body cells from larvae exposed to either normoxia or 5% O<sub>2</sub> hypoxia for 2hrs at 96-hour AEL. Genotypes: >PTEN (*UAS-PTEN/+*); *r4*>PTEN (*UAS-PTEN/+*; *r4-GAL4/+*). Scale bar is 50  $\mu$ m. (B) Quantification of FOXO nuclear localization in fat body cells from larvae exposed to either normoxia or 5% O<sub>2</sub> hypoxia for 2hrs at 96-hour AEL. Genotypes: >PTEN (*UAS-PTEN/+*); *r4*>PTEN (*UAS-PTEN/+*; *r4-GAL4/+*). N= total number of cells analyzed.

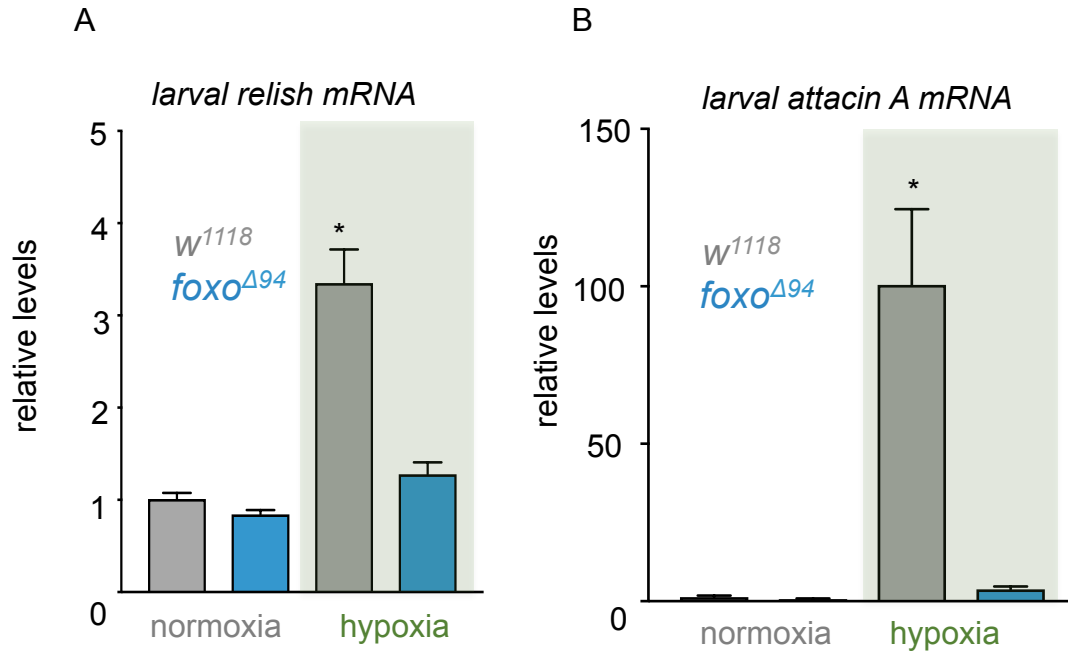

**Figure S5. *relish* is induced by FOXO in hypoxic larvae.** Expression levels of (A) *relish* or (B) *attacin A* mRNA in *w<sup>1118</sup>* and *foxo<sup>Δ94</sup>* larvae exposed to 5% O<sub>2</sub> for 6 hours. Data represent mean + SEM, N=10, \*p<0.05, 2-way ANOVA followed by students t-test.

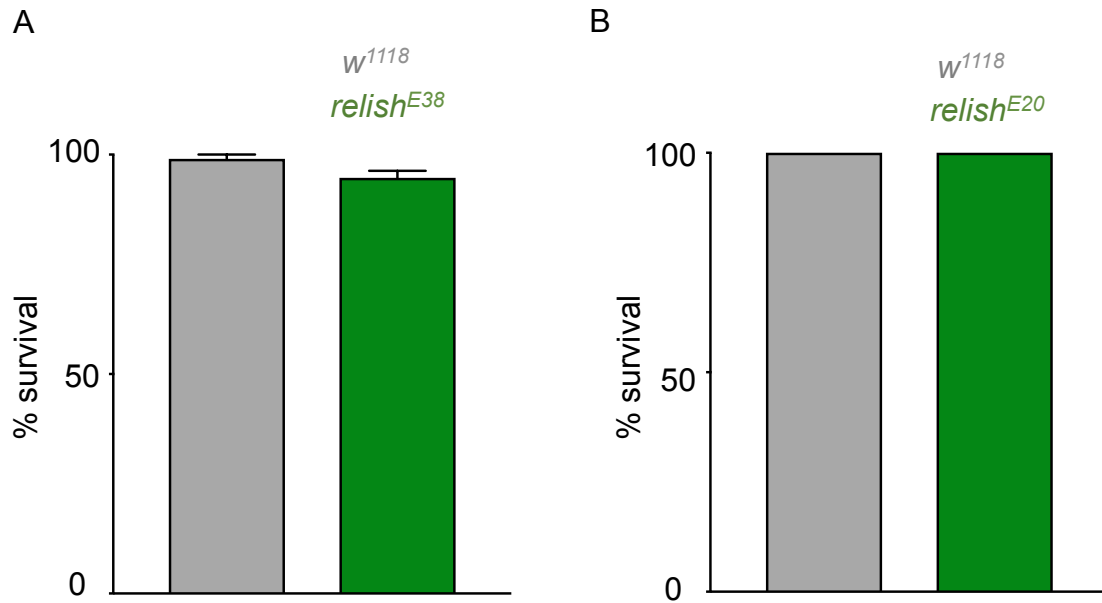

**Figure S6 (corresponding to Figure 7). *Relish* mutant survival is not affected in normoxia.** (A, B) Survival of adult female *w<sup>1118</sup>* or (A) *relish<sup>E38</sup>* or (B) *relish<sup>E20</sup>* flies maintained in normoxia. Data represents mean + SEM, N= \*p<0.05, students t-test.

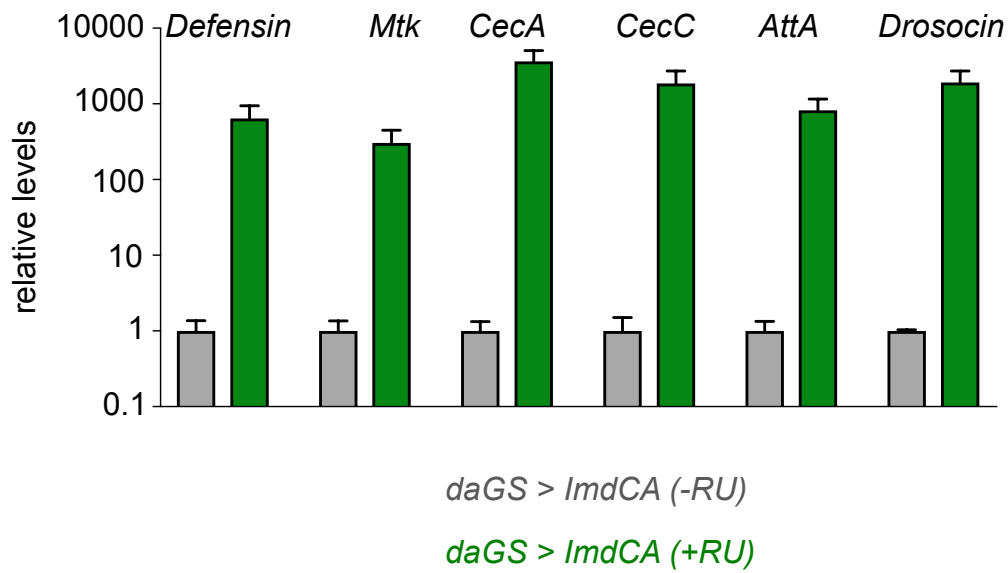

**Figure S7 (corresponding to Figure 7). ImdCA expression induces expression of relish target genes.** Data show relative mRNA levels for Relish target genes measured by qRT-PCR from *da-GAL4GeneSwitch > UAS ImdCA* adult female flies with (+RU) or without (-RU) feeding of RU486 to induce Gal4-mediated transgene expression. N=6 per condition. Data represent mean + SEM. \* p, 0.05, students t-test.
